# Supplementary material for: Utility of patient-derived xenografts to evaluate drug sensitivity and select optimal treatments for individual non-small-cell lung cancer patients
Source: Research Square preprint supplement (doi:10.21203/rs.3.rs-3866252/v1), 2024-01-19
Supplement: Supplementary file 1 [file dc1f40a87de66783b7f20e6b.docx]

**Table S1.** **Clinical and pathological characteristics of 62 NSCLC patients**

| **Patient ID** | **Sex** | **Age**  **(years)** | **Smoking**  **habits** | **Histology** | **TNM** | **Stage** | **Site** | **Tumor size**  **(cm3)** | **Metastasis** | **Driver oncogene**  **status** |
| --- | --- | --- | --- | --- | --- | --- | --- | --- | --- | --- |
| Patient#1 | Female | 50 | No | ADC | T2N3M1 | ⅣA | LLL | 13.50 | Yes | ALK+ |
| Patient#2 | Female | 55 | No | ADC | T1cN0M0 | ⅠA3 | LUL | 1.51 | No | NE |
| Patient#3 | Female | 64 | No | SCC | T1bN0M0 | ⅠA2 | RLL | 1.52 | No | WT |
| Patient#4 | Male | 58 | No | ADC | T2bN0M0 | ⅡA | RLL | 3.56 | No | EGFR exon 20 ins |
| Patient#5 | Female | 78 | No | ADC | T1cN2M0 | ⅢA | RLL | 4.05 | Yes | KRAS G13X |
| Patient#6 | Female | 69 | No | ADC | T2aN0M0 | ⅠB | LUL | 4.86 | No | EGFR exon 21 L858R |
| Patient#7 | Female | 59 | No | ADC | T1cN1M0 | ⅡB | LUL | 5.10 | Yes | EGFR exon 19 del |
| Patient#8 | Female | 55 | No | ADC | T2aN2M0 | ⅢA | RUL | 5.60 | Yes | EGFR exon 19 del |
| Patient#9 | Male | 68 | Yes | ADC | T1bN2M0 | ⅢA | RUL | 5.78 | Yes | WT |
| Patient#10 | Female | 48 | No | ADC | T2aN0M0 | ⅠB | LUL | 6.05 | No | EGFR exon 21 L858R |
| Patient#11 | Male | 50 | Yes | ADC | T1bN0M0 | ⅠA2 | RUL | 6.30 | No | KRAS G13X |
| Patient#12 | Male | 64 | Yes | ADC | T1bNxM0 | ⅡB | RLL | 6.58 | Yes | EGFR exon 19 del |
| Patient#13 | Female | 55 | No | ADC | T1cN0M0 | ⅠA3 | LUL | 7.42 | No | WT |
| Patient#14 | Female | 58 | No | ADC | T1cN2M0 | ⅢA | LUL | 7.45 | Yes | EGFR exon 19 del |
| Patient#15 | Male | 66 | Yes | ADC | T1bN0M0 | ⅠA2 | LUL | 7.50 | No | WT |
| Patient#16 | Female | 74 | No | ADC | T1cN0M0 | ⅠA3 | RUL | 7.84 | No | MET exon 14 alternative splicing aberrations |
| Patient#17 | Male | 70 | Yes | ADC+SCC | T1cN0M0 | ⅠA3 | LUL | 9.26 | No | NE |
| Patient#18 | Female | 69 | No | ADC | T2aN2M0 | ⅢA | LUL | 12.80 | Yes | KRAS G12C |
| Patient#19 | male | 66 | Yes | LCNEC | T2aN0M0 | ⅠB | LLL | 13.50 | No | WT |
| Patient#20 | Female | 69 | No | ADC | T1cN2M0 | ⅢA | RUL | 13.85 | Yes | EGFR exon 21 L858R |
| Patient#21 | Male | 58 | Yes | SCC | T2aN0M0 | ⅠB | RLL | 14.60 | No | WT |
| Patient#22 | Male | 69 | Yes | ADC | T4N0M1a | ⅣA | RUL | 15.01 | Yes | EGFR exon 21 L858R |
| Patient#23 | Male | 74 | No | ADC | T2aN1M0 | ⅡB | RLL | 15.80 | Yes | WT |
| Patient#24 | Male | 53 | Yes | ADC | T1cN0M0 | ⅠA3 | RUL | 16.30 | No | EGFR exon 19 del |
| Patient#25 | Female | 54 | No | ADC | T2aN0M0 | ⅠB | RLL | 16.30 | No | EGFR exon 19 del |
| Patient#26 | Female | 51 | No | ADC | T2aN0M0 | ⅠB | RLL | 17.36 | No | NE |
| Patient#27 | Female | 68 | No | ADC | T2N2M0 | ⅢA | LUL | 18.00 | Yes | EGFR exon 21 L858R |
| Patient#28 | Female | 70 | No | ADC | T2aN0M0 | ⅠB | RML | 18.25 | No | EGFR exon 21 L858R |
| Patient#29 | Male | 71 | No | ADC | T2bN0M0 | ⅡA | LUL | 19.50 | No | EGFR exon 19 del |
| Patient#30 | Female | 56 | No | ADC | T1cN0M0 | ⅠA3 | LLL | 19.60 | No | EGFR exon 21 L858R |
| Patient#31 | Female | 71 | No | ADC | T1cN0M0 | ⅠA3 | LUL | 19.72 | No | EGFR exon 21 L858R |
| Patient#32 | Female | 73 | No | ADC | T1cN0M0 | ⅠA3 | RLL | 21.88 | No | WT |
| Patient#33 | Male | 72 | Yes | ADC | T2N2M1a | ⅣA | RUL | 21.88 | Yes | EGFR exon 21 L858R |
| Patient#34 | Female | 54 | No | ADC | T2aN0M0 | ⅠB | LUL | 22.05 | No | NE |
| Patient#35 | Female | 72 | No | ADC | T2aN0M0 | ⅠB | RML | 22.31 | No | NE |
| Patient#36 | Female | 66 | No | ADC | T2aN1M0 | ⅡB | RLL | 22.87 | Yes | EGFR exon 19 del |
| Patient#37 | Female | 66 | No | ADC | T2aN0M0 | ⅠB | LUL | 24.30 | No | EGFR exon 19 del |
| Patient#38 | Male | 59 | No | ADC | T1cN0M0 | ⅠA3 | LUL | 24.70 | No | WT |
| Patient#39 | Male | 69 | No | ADC | T2aN0M0 | ⅠB | LUL | 25.30 | No | WT |
| Patient#40 | Female | 65 | No | ADC | T2aN0M0 | ⅠB | LUL | 25.40 | No | EGFR exon 21 L858R |
| Patient#41 | Male | 59 | Yes | ADC | T2aN2M0 | ⅢA | LLL | 26.90 | Yes | EGFR exon 18 G719X |
| Patient#42 | Female | 78 | No | ADC | T1cN2M0 | ⅢA | RUL | 27.20 | Yes | EGFR exon 21 L858R |
| Patient#43 | Female | 56 | No | ADC | T1cN0M0 | ⅠA3 | LUL | 27.40 | No | WT |
| Patient#44 | Female | 44 | No | ADC | T4NXM1a | ⅣA | LUL | 27.80 | Yes | EGFR exon 19 del |
| Patient#45 | Male | 56 | Yes | SCC | T2bN0M0 | ⅡA | LLL | 27.90 | No | WT |
| Patient#46 | Male | 63 | Yes | SCC | T2aN1M0 | ⅡB | LLL | 29.30 | Yes | KRAS G13C |
| Patient#47 | Female | 68 | No | SCC | T3N1M0 | ⅢA | RLL | 29.60 | Yes | NE |
| Patient#48 | Male | 60 | No | ADC | T4N2M0 | ⅢB | RLL | 29.74 | Yes | WT |
| Patient#49 | Male | 63 | Yes | SCC | T4N0M0 | ⅢA | LUL | 30.34 | No | WT |
| Patient#50 | Female | 59 | No | ADC | T2N2M0 | ⅢA | LUL | 31.97 | Yes | EGFR exon 21 L858R |
| Patient#51 | Female | 67 | No | ADC | T2aN0M0 | ⅠB | RUL | 36.00 | Yes | WT |
| Patient#52 | Female | 58 | No | ADC | T2aN0M0 | ⅠB | LLL | 36.20 | No | WT |
| Patient#53 | Male | 72 | No | ADC | T2aN0M0 | ⅠB | RLL | 46.80 | No | WT |
| Patient#54 | Female | 72 | No | ADC | T1cN0M0 | ⅠA3 | RLL | 47.80 | No | HER2 exon 20 ins |
| Patient#55 | Female | 71 | No | ADC | T2aN0M0 | ⅠB | RLL | 59.30 | No | EGFR exon 21 L858R |
| Patient#56 | Female | 61 | No | ADC | T2aN0M0 | ⅠB | RLL | 76.10 | No | EGFR exon 21 L858R |
| Patient#57 | Female | 67 | No | ADC | T1bN0M0 | ⅠA2 | RML | 77.33 | No | WT |
| Patient#58 | Female | 65 | No | ADC | T1cN1M0 | ⅡB | RLL | 79.30 | Yes | WT |
| Patient#59 | Female | 79 | No | ADC | T1bN0M0 | ⅠA2 | LUL | 101.60 | No | EGFR exon 21 L858R |
| Patient#60 | Male | 66 | Yes | SCC | T3N0M0 | ⅡB | RLL | 129.60 | No | WT |
| Patient#61 | Male | 48 | Yes | ADC | T1N2M0 | ⅢA | RUL | 217.70 | Yes | EGFR exon 21 L858R |
| Patient#62 | Male | 70 | Yes | ADC | T1cN0M0 | ⅠA3 | RLL | 296.30 | No | KRAS G13C |

TNM, tumor node metastasis; ADC, adenocarcinoma; SCC, squamous cell carcinoma; LCNEC, large cell neuroendocrine lung cance; LUL, left upper lobe; RLL, right lower lobe; RML, right middle lobe; LLL, left lower lobe; RUL, right upper lobe.
